# Supplementary material for: Catalysis and molecular magnetism of dinuclear iron(iii) complexes with N-(2-pyridylmethyl)-iminodiethanol/-ate
Source: Royal Society of Chemistry journal article supplement (doi:10.1039/c3dt53376j), 2014-01-01
Supplement: c3dt53376j.pdf [file c3dt53376j.pdf]

## Supporting Information

### **Catalysis and molecular magnetism of dinuclear iron(III) complexes with *N*-(2-pyridylmethyl)-iminodiethanol/-ate**

**Jong Won Shin, Jeong Mi Bae, Cheal Kim, and Kil Sik Min**

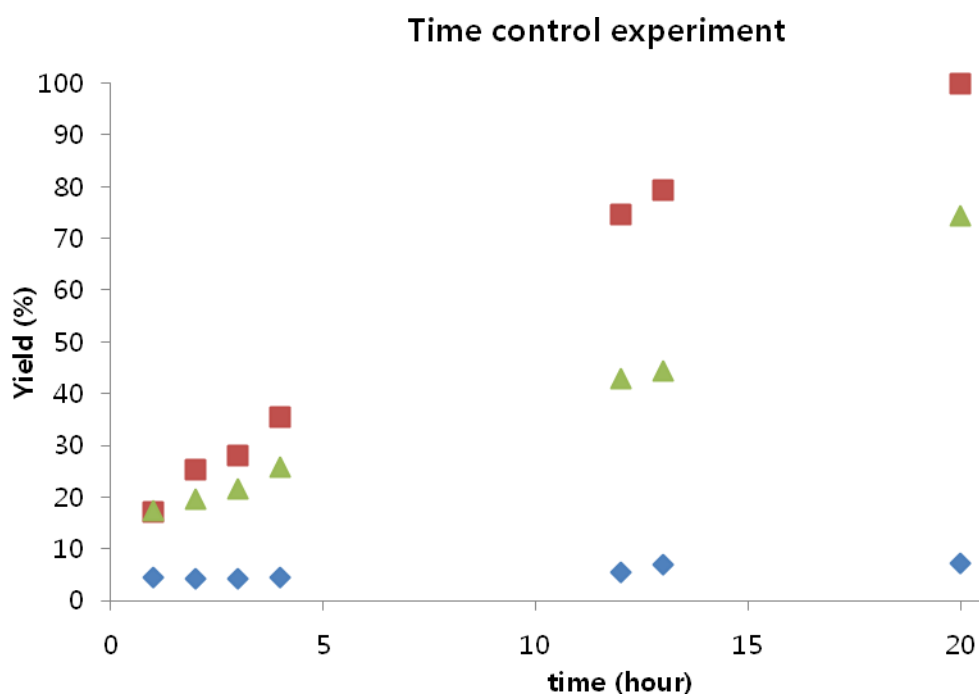

**Fig. S1.** Time-course for the **1**-catalyzed oxidation of cyclohexanol with *t*-BuOOH in CH<sub>3</sub>CN. Reaction conditions: catalyst;  $1.2 \times 10^{-3}$  mmol, cyclohexanol; 0.30 mmol, *t*-BuOOH; 0.03 mmol, dodecane; 0.01 mmol, solvent; CH<sub>3</sub>CN (1 mL).

◆ without catalyst, ▲ [(pmide)Fe(N<sub>3</sub>)]<sub>2</sub>, ■ [(Hpmdide)Fe(NO<sub>3</sub>)]<sub>2</sub>(NO<sub>3</sub>)<sub>2</sub>

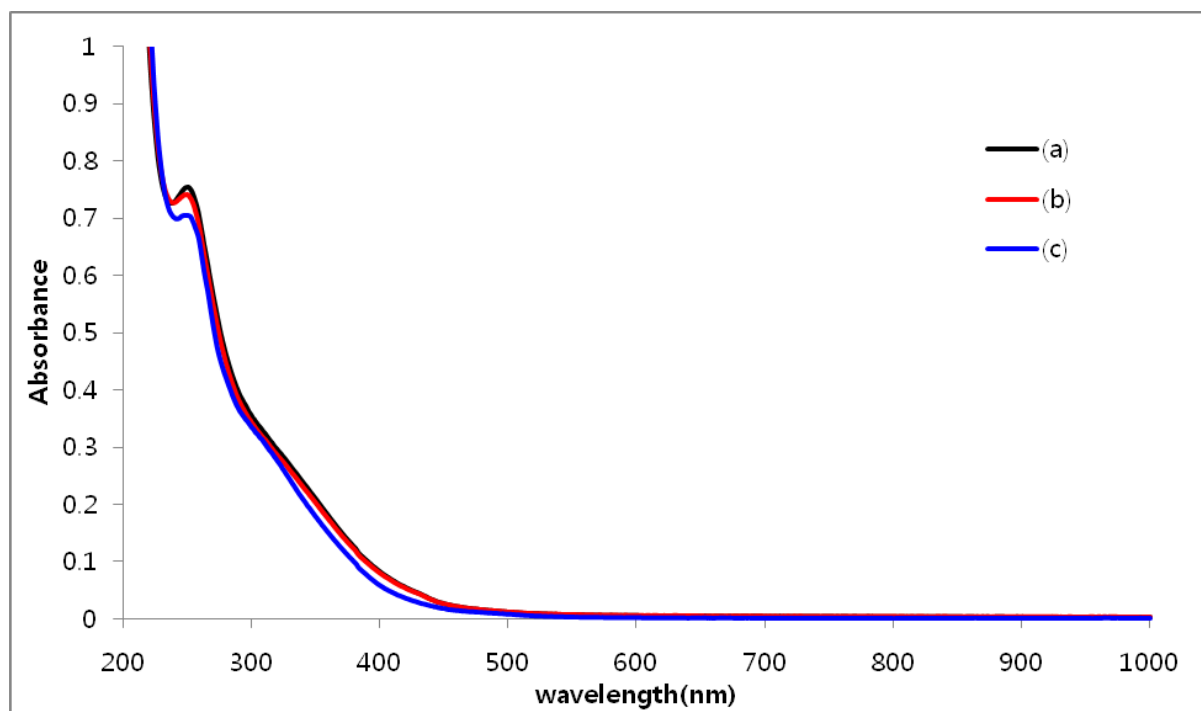

**Fig. S2.** UV-vis spectra of (a) **1** ( $1.2 \times 10^{-3}$  mmol) with 250 equiv of cyclohexanol (black line), (b) immediately after the addition of *t*-BuOOH (25 equiv) (red line), and (c) 24 h after the addition of *t*-BuOOH (25 equiv) (blue line) in  $\text{CH}_3\text{CN}$  at room temperature. All UV-vis spectra were taken after 30 times dilution.

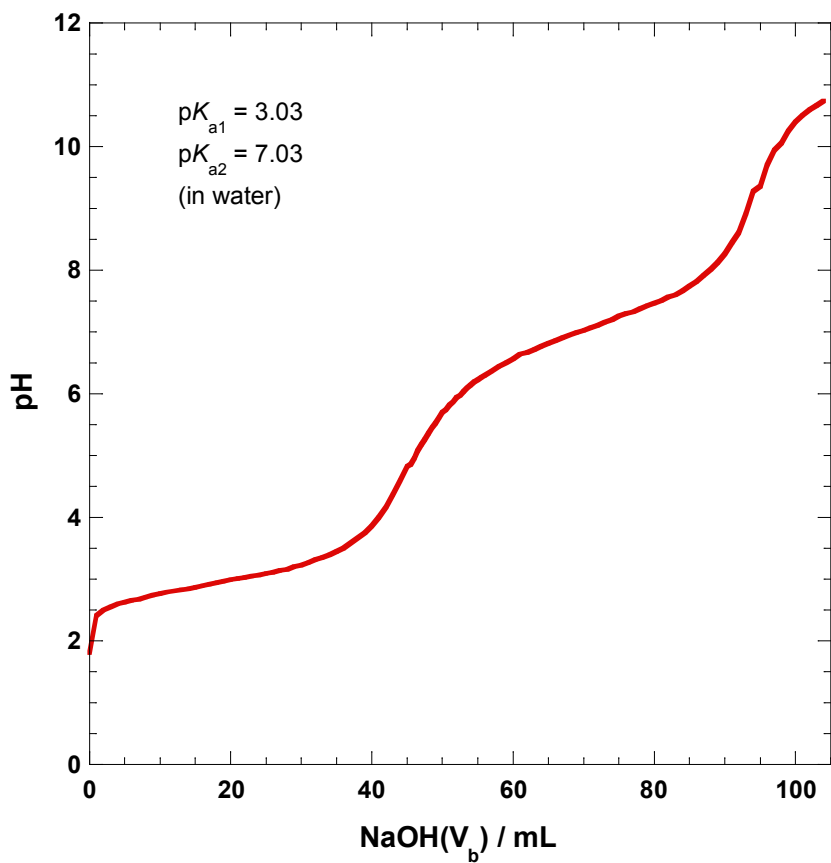

**Fig. S3.** Titration curve for the reaction of 0.025 M [(Hpmide)Fe(NO<sub>3</sub>)<sub>2</sub>]<sub>2</sub>(NO<sub>3</sub>)<sub>2</sub>•2CH<sub>3</sub>OH (10 mL) and 0.01 M NaOH.
